# Supplementary material for: Elucidating the Racemization Mechanism of Aliphatic and Aromatic Amino Acids by In Silico Tools
Source: MDPI journal article supplement (doi:10.3390/ijms241511877), 2023-07-25
Supplement: s1 [file s1]

# **In silico study of the racemization mechanism of aliphatic and aromatic amino acids**

## **Supplementary Material**

### **Index of Figures**

|                                                                                                                                                                |   |
|----------------------------------------------------------------------------------------------------------------------------------------------------------------|---|
| <b>Figure S1:</b> Hammett $\sigma$ plot using $W_2$ for calculations of kinetic constants.....                                                                 | 2 |
| <b>Figure S2:</b> Hammett $\sigma$ plot using $W_3$ for calculations of kinetic constants.....                                                                 | 2 |
| <b>Figure S3:</b> Hammett $\sigma$ plot using $W_{23}$ for calculations of kinetic constants. ....                                                             | 3 |
| <b>Figure S4:</b> IRC breaking of $C_1-H_5$ bond profile for racemization of aromatic compounds. ....                                                          | 3 |
| <b>Figure S5:</b> IRC breaking of $C_1-H_5$ bond profile for racemization of aliphatic compounds.....                                                          | 4 |
| <b>Figure S6:</b> Bond length difference from reactant to transition state. $H_5-O_6$ formation length diminishes and $C_1-H_5$ cleavage length increases..... | 4 |
| <b>Figure S7:</b> Bond length difference from transition state to product. $H_5-O_6$ formation length diminishes and $C_1-H_5$ cleavage length increases.....  | 5 |
| <b>Figure S8:</b> IRC $C_1-H_5-O_6$ bond angle profile for racemization of aromatic compounds. ....                                                            | 5 |
| <b>Figure S9:</b> Bond length comparison between the $C_1-H_5$ bond and $H_5-O_6$ across IRC calculations. ....                                                | 6 |
| <b>Figure S10:</b> IRC dipole profile for racemization of aromatic compounds. ....                                                                             | 7 |
| <b>Figure S11:</b> IRC dipole profile for racemization of aliphatic compounds. ....                                                                            | 7 |
| <b>Figure S12:</b> Aromatic amino acids structure in basic media. ....                                                                                         | 8 |

### **Index of Tables**

|                                                                                                                                                                                                                       |   |
|-----------------------------------------------------------------------------------------------------------------------------------------------------------------------------------------------------------------------|---|
| <b>Table S1:</b> Square correlation coefficient $R^2$ and slope $m$ of linear regression between NBO charges of reactant (R), transition state (TS), and intermediate (I) and experimental energy of activation. .... | 6 |
|-----------------------------------------------------------------------------------------------------------------------------------------------------------------------------------------------------------------------|---|

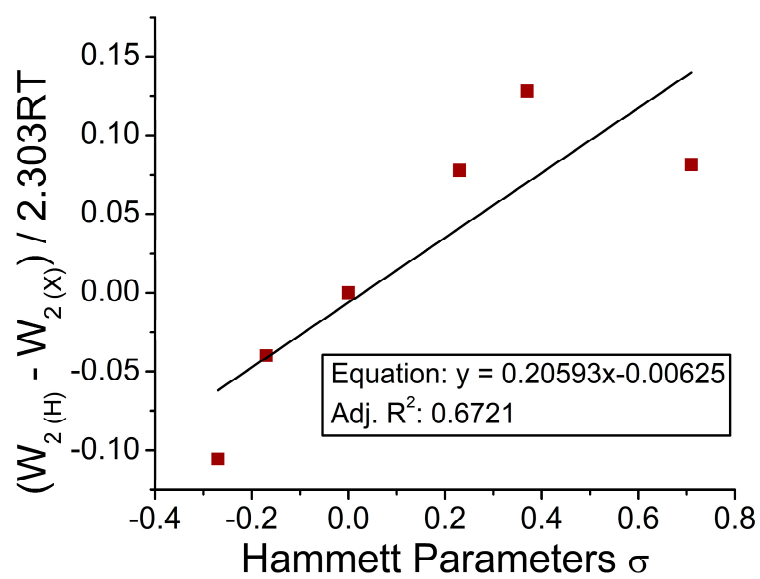

**Figure S1:** Hammett  $\sigma$  plot using  $W_2$  for calculations of kinetic constants.

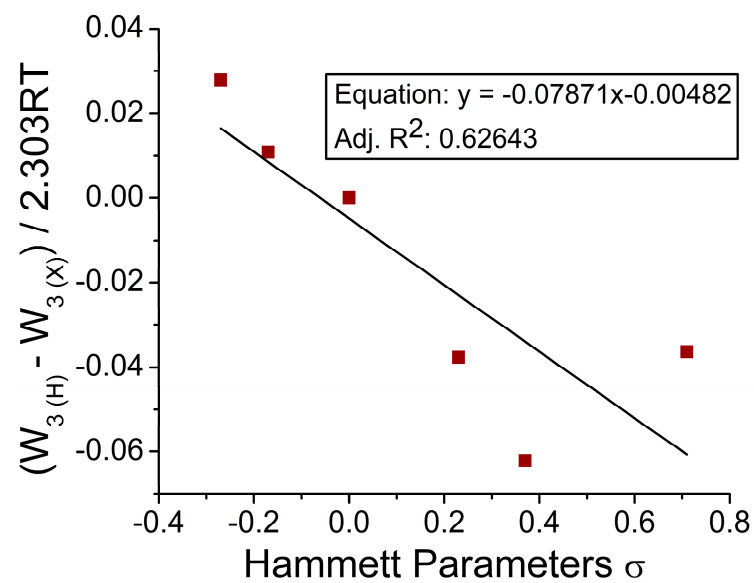

**Figure S2:** Hammett  $\sigma$  plot using  $W_3$  for calculations of kinetic constants.

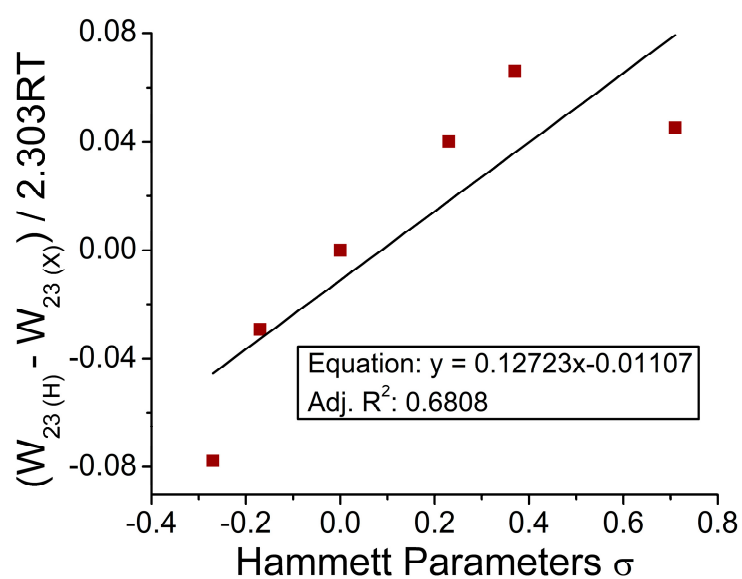

**Figure S3:** Hammett  $\sigma$  plot using  $W_{23}$  for calculations of kinetic constants.

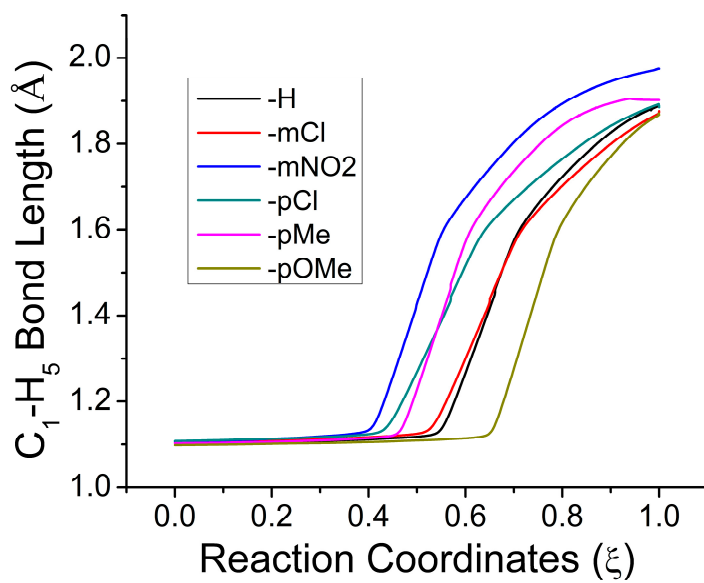

**Figure S4:** IRC breaking of  $C_1-H_5$  bond profile for racemization of aromatic compounds.

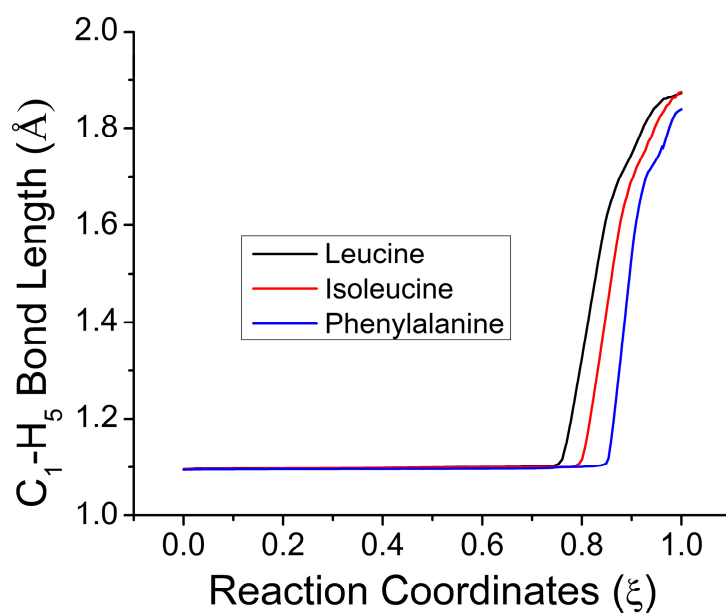

**Figure S5:** IRC breaking of C<sub>1</sub>-H<sub>5</sub> bond profile for racemization of aliphatic compounds.

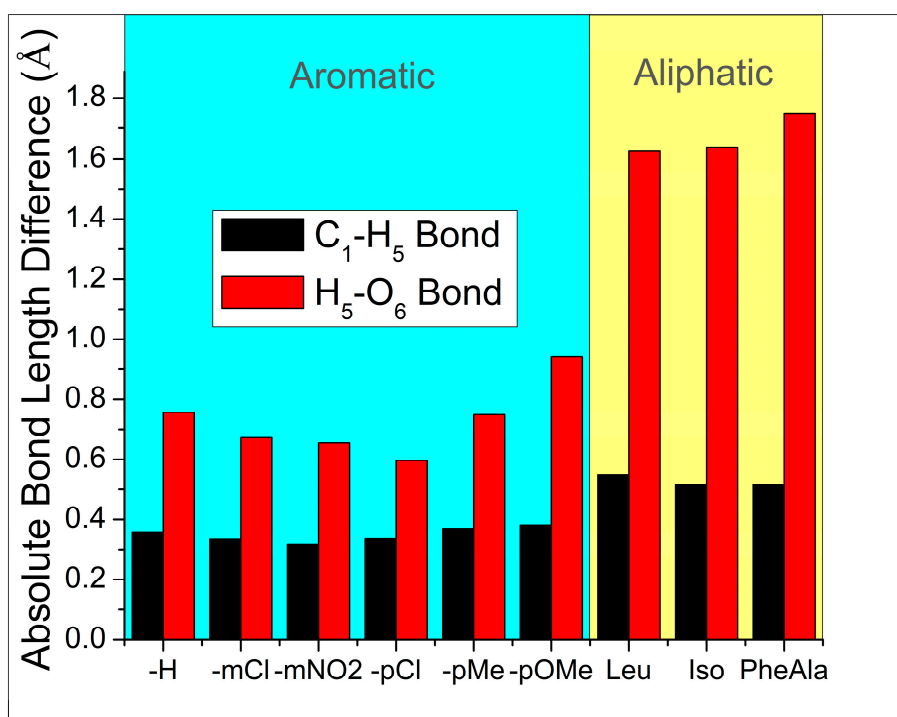

**Figure S6:** Bond length difference from reactant to transition state. H<sub>5</sub>-O<sub>6</sub> formation length diminishes and C<sub>1</sub>-H<sub>5</sub> cleavage length increases.

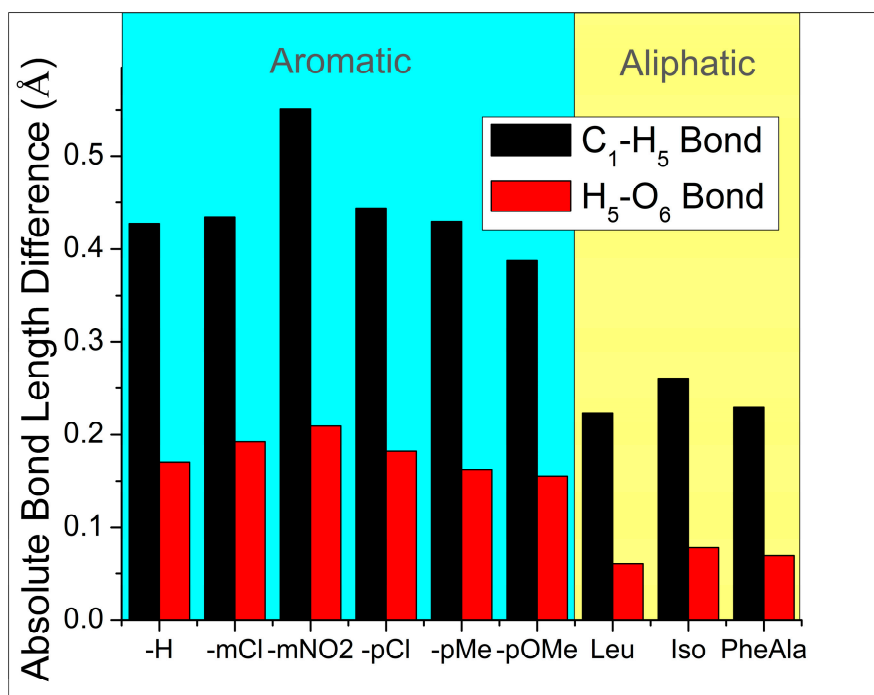

**Figure S7:** Bond length difference from transition state to product. H<sub>5</sub>-O<sub>6</sub> formation length diminishes and C<sub>1</sub>-H<sub>5</sub> cleavage length increases.

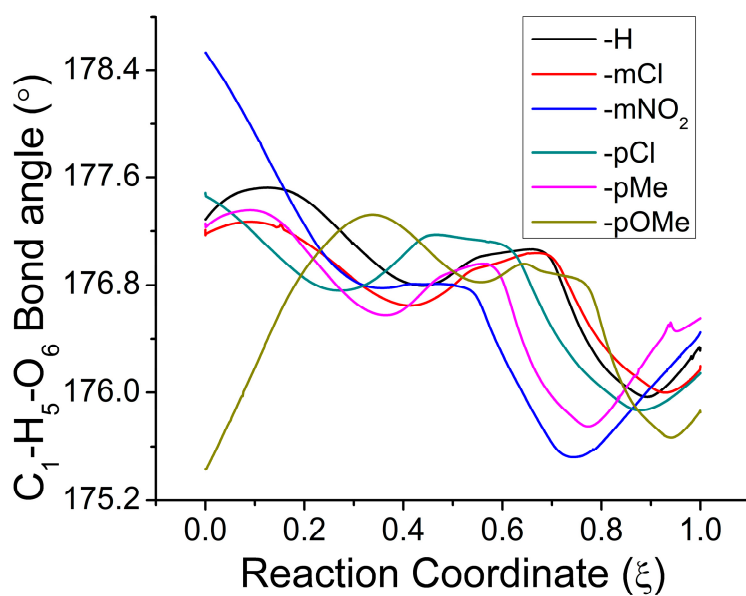

**Figure S8:** IRC C<sub>1</sub>-H<sub>5</sub>-O<sub>6</sub> bond angle profile for racemization of aromatic compounds.

**Table S1:** Square correlation coefficient  $R^2$  and slope  $m$  of linear regression between NBO charges of reactant (R), transition state (TS), and intermediate (I) and experimental energy of activation.

| Atom           |       | R                   | TS      | I       | TS-R    | I-TS      | I-R     |
|----------------|-------|---------------------|---------|---------|---------|-----------|---------|
| C <sub>1</sub> | $R^2$ | 0.757 <sup>2</sup>  | 0.178   | 0.013   | 0.721   | < 0.001   | 0.602   |
|                | $m$   | 0.0110 <sup>3</sup> | 0.0004  | 0.0004  | -0.0106 | > -0.0001 | -0.0107 |
| C <sub>2</sub> | $R^2$ | 0.026               | 0.906   | 0.982   | 0.951   | < 0.001   | 0.983   |
|                | $m$   | 0.0002              | -0.0078 | -0.0078 | -0.0080 | > -0.0001 | -0.0080 |
| N <sub>3</sub> | $R^2$ | 0.948               | 0.988   | 0.989   | 0.933   | 0.827     | 0.552   |
|                | $m$   | -0.0025             | -0.0039 | -0.0032 | -0.0014 | 0.0007    | -0.0007 |
| C <sub>4</sub> | $R^2$ | 0.675               | 0.676   | 0.673   | 0.372   | 0.571     | 0.023   |
|                | $m$   | -0.0434             | -0.0446 | -0.0431 | -0.0012 | 0.0015    | 0.0003  |
| H <sub>5</sub> | $R^2$ | 0.865               | 0.907   | 0.385   | 0.454   | 0.833     | 0.184   |
|                | $m$   | -0.0135             | 0.0044  | -0.0008 | 0.0109  | -0.0052   | 0.0058  |
| O <sub>6</sub> | $R^2$ | 0.753               | 0.804   | 0.759   | 0.701   | 0.799     | 0.014   |
|                | $m$   | -0.0052             | 0.0064  | -0.0032 | 0.0089  | -0.0096   | -0.0007 |

2. The highest correlation for each atom is highlighted in blue.  
3. The highest absolute slope value for each atom is highlighted in purple.

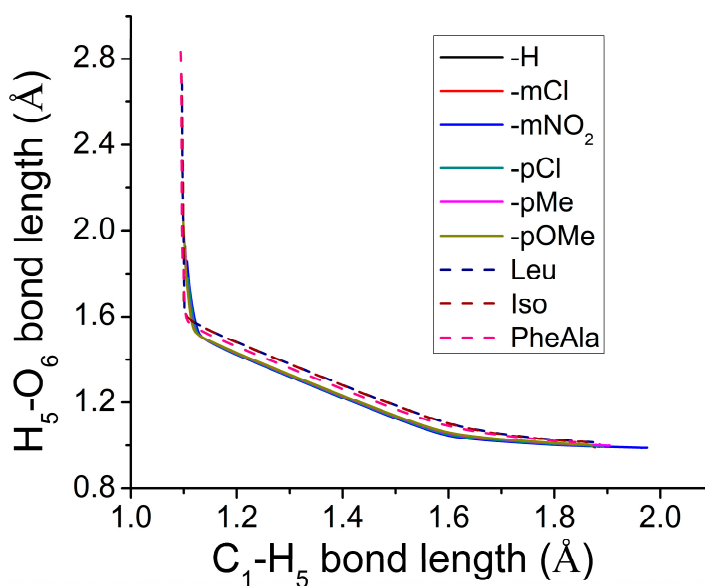

**Figure S9:** Bond length comparison between the C<sub>1</sub>-H<sub>5</sub> bond and H<sub>5</sub>-O<sub>6</sub> across IRC calculations.

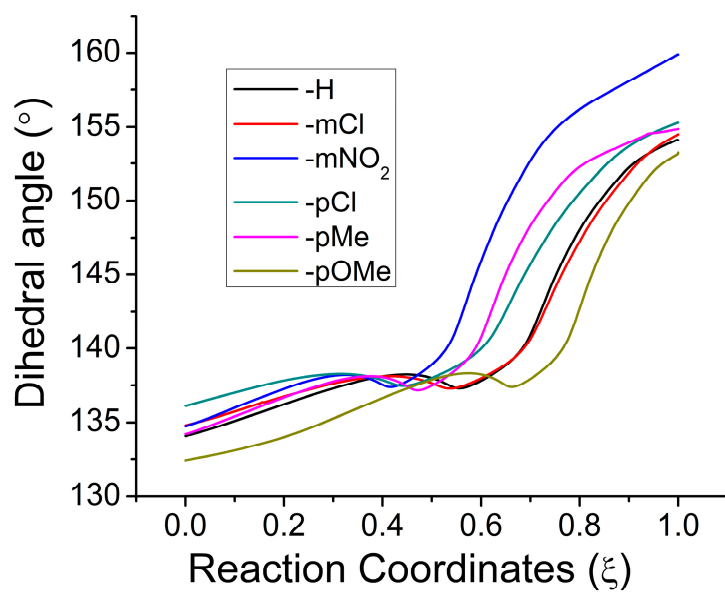

**Figure S10:** IRC dipole profile for racemization of aromatic compounds.

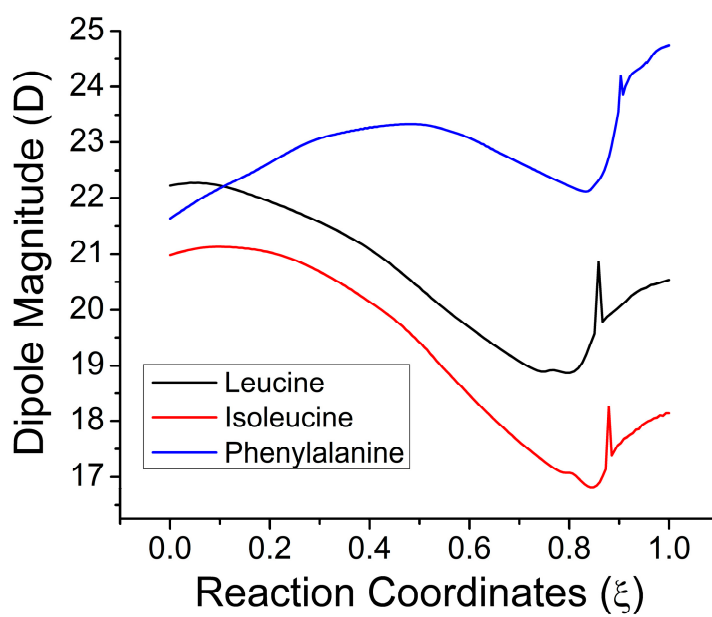

**Figure S11:** IRC dipole profile for racemization of aliphatic compounds.

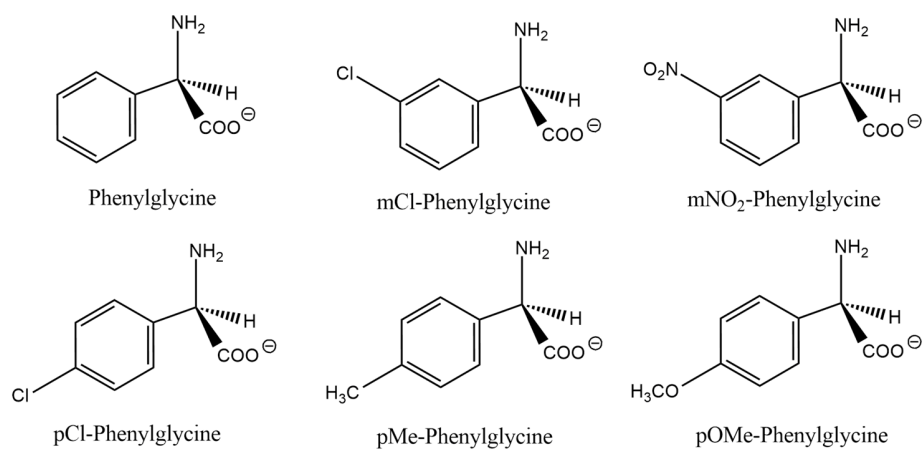

**Figure S12:** Aromatic amino acids structure in basic media.
